# Supplementary material
Source: PubMed Central journal article supplement (PMC3901427)
Supplement: NIHMS537540-supplement-1_si_001.pdf [file NIHMS537540-supplement-1_si_001.pdf]

## **SUPPORTING INFORMATION**

### **NMR investigation of the role of osteocalcin and osteopontin**

#### **at the organic-inorganic interface in bone**

Ondřej Nikel; Danielle Laurencin; Scott A. McCallum; Caren M. Gundberg; Deepak Vashishth

## Bone mineral

We have attempted to distinguish bone mineral of OC-OPN<sup>-/-/-</sup> bone from that of WT control in terms of chemical shift and peak widths:

1/ The difference in <sup>31</sup>P chemical shifts  $\Delta\delta$  between the individual phosphorous environments extracted from the HETCOR spectra was defined (see Figure S1 A for OH...PO<sub>4</sub><sup>3-</sup> vs H-PO<sub>4</sub><sup>2-</sup>) and plotted as function of CP contact time (Figure S1 B for OH...PO<sub>4</sub><sup>3-</sup> vs H-PO<sub>4</sub><sup>2-</sup>).

2/ The <sup>31</sup>P peak widths of each individual <sup>31</sup>P environment were evaluated as a function of CP time (Figure S2). Although these <sup>31</sup>P peak widths appear to drift slightly, the difference between WT and OC-OPN<sup>-/-/-</sup> at any given CP time (see Table S1 for 1.5 ms) was small.

3/ The <sup>1</sup>H peak widths, obtained from deconvolution of the projection spectrum into the <sup>1</sup>H signals corresponding to the three <sup>31</sup>P environments, were examined. (Table S1) Note that the OH signal was deconvoluted into two contributions (Figure S3).

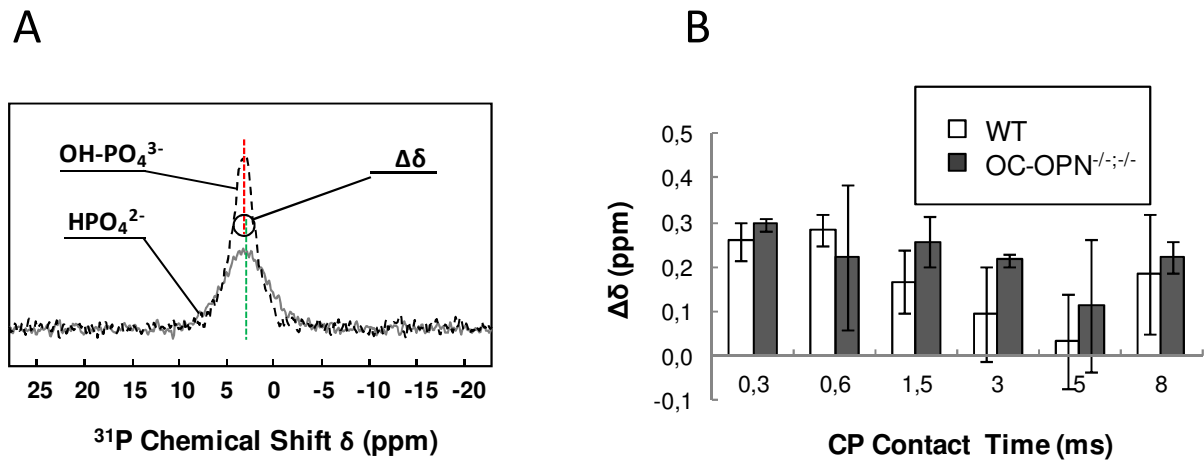

**Figure S1 A/** <sup>31</sup>P chemical shift difference  $\Delta\delta$  between OH-PO<sub>4</sub><sup>3-</sup> and HPO<sub>4</sub><sup>2-</sup> resonances (i.e. difference in ppm between the red and green lines, which cross through the maxima of the

OH-PO<sub>4</sub><sup>3-</sup> and HPO<sub>4</sub><sup>2-</sup> resonances, respectively).

B/ Changes in the measured difference  $\Delta\delta$  with CP contact time.

**Table S1** Relative  $^{31}\text{P}$  chemical shift  $\Delta\delta$  (as defined in Figure S1 A), and  $^1\text{H}$  and  $^{31}\text{P}$  peak widths for the three  $^{31}\text{P}$  environments distinguished by  $^1\text{H}$ - $^{31}\text{P}$  HETCOR for bone specimens from OC-OPN $^{-/-/-}$  mutants and their WT littermates.

|                                                                                           | Peak <sup>a</sup> |                                      | WT            | OC-OPN $^{-/-/-}$ |
|-------------------------------------------------------------------------------------------|-------------------|--------------------------------------|---------------|-------------------|
| $\Delta\delta (^{31}\text{P}) = (\delta_{\text{X}} - \delta_{\text{OH-PO}_4})^b$<br>(ppm) | #1                | OH- $\text{PO}_4^{3-}$               | /             | /                 |
|                                                                                           | #2                | H <sub>2</sub> O- $\text{PO}_4^{3-}$ | $0.0 \pm 0.1$ | $0.1 \pm 0.1$     |
|                                                                                           | #3                | HPO <sub>4</sub> $^{2-}$             | $0.2 \pm 0.1$ | $0.2 \pm 0.1$     |
| $^{31}\text{P}$ peak width <sup>c</sup><br>(ppm)                                          | #1                | OH- $\text{PO}_4^{3-}$               | $3.2 \pm 0.1$ | $3.2 \pm 0.1$     |
|                                                                                           | #2                | H <sub>2</sub> O- $\text{PO}_4^{3-}$ | $5.5 \pm 0.1$ | $5.4 \pm 0.1$     |
|                                                                                           | #3                | HPO <sub>4</sub> $^{2-}$             | $5.8 \pm 0.1$ | $5.8 \pm 0.1$     |
| $^1\text{H}$ peak width <sup>c</sup><br>(ppm)                                             | #1a               | OH- $\text{PO}_4^{3-}$               | $1.2 \pm 0.2$ | $1.1 \pm 0.2$     |
|                                                                                           | #1b               | OH- $\text{PO}_4^{3-}$               | $2.0 \pm 0.4$ | $1.9 \pm 0.4$     |
|                                                                                           | #2                | H <sub>2</sub> O- $\text{PO}_4^{3-}$ | $2.0 \pm 0.3$ | $2.1 \pm 0.3$     |
|                                                                                           | #3                | HPO <sub>4</sub> $^{2-}$             | $9.8^d$       | $9.8^d$           |

<sup>a</sup> Peak numbering is defined in Figures 2A (#1, #2 and #3) and S3 (#1a and #1b).

<sup>b</sup> Average for contact times from 0.3 to 8 ms.

<sup>c</sup> Width at half maximum measured for HETCOR spectra recorded at 1.5 ms contact time.

<sup>d</sup> Larger error on the peakwidth (very broad, low intensity signal).

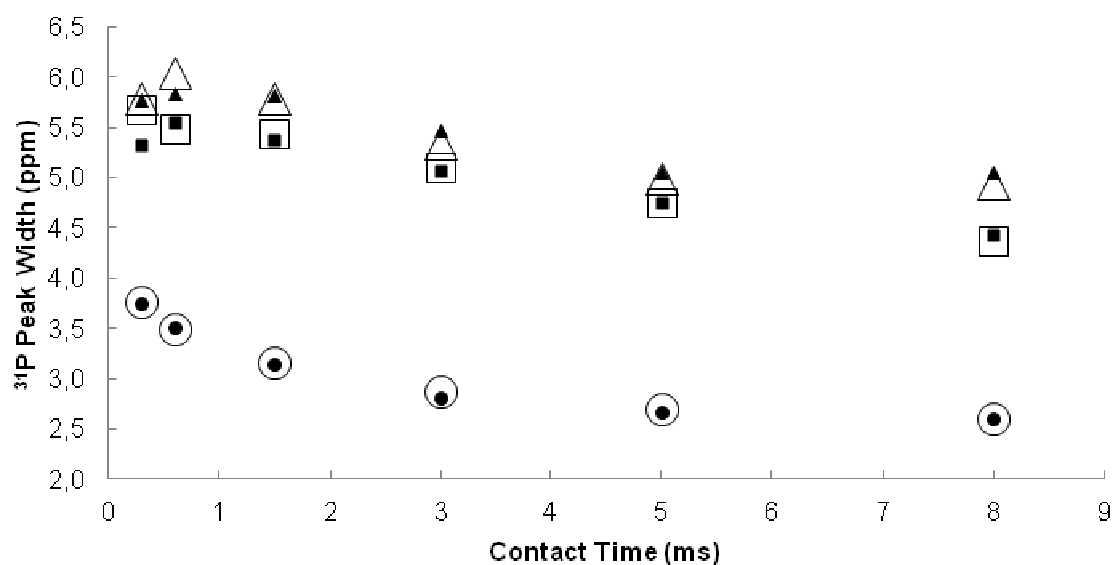

**Figure S2**  $^{31}\text{P}$  peak widths extracted from the 2D  $^1\text{H}$ - $^{31}\text{P}$  HETCOR spectra of WT (hollow markers) and OC-OPN $^{-/-/-}$  (filled markers) bone specimens. The widths of OH- $\text{PO}_4^{3-}$ , H<sub>2</sub>O- $\text{PO}_4^{3-}$  and HPO<sub>4</sub> $^{2-}$  environments are shown as circle, rectangle and triangle, respectively. Errors are in the order of size of the hollow markers.

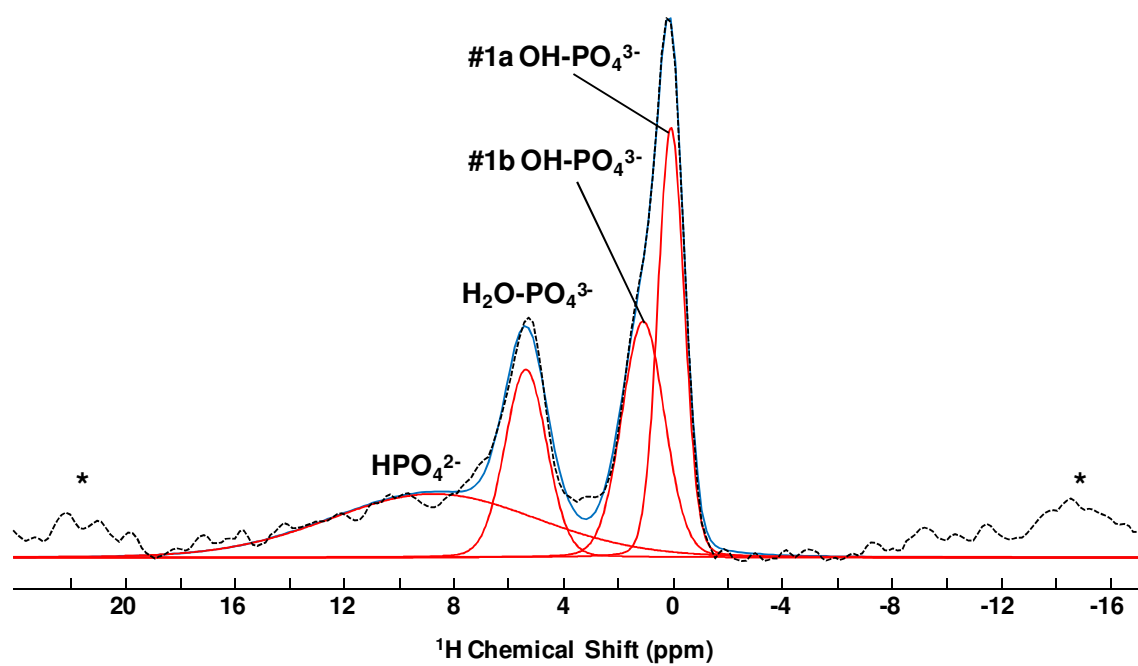

**Figure S3** Deconvolution of the F1 projection of one of the  $^1\text{H} \rightarrow ^{31}\text{P}$  HETCOR spectra recorded. Two environments for the  $\text{OH}-\text{PO}_4^{3-}$  signals appear to be present (**#1a** and **#1b**). Spinning sidebands are marked by the asterisk.

## Organic matrix

The intensity of individual  $^{13}\text{C}$  signals of organic matrix were deconvoluted and compared between WT and OC-OPN<sup>-/-</sup> (Table S2).

**Table S2** Parameters extracted from the deconvolution of the  $^1\text{H}$ - $^{13}\text{C}$  CPMAS NMR spectra of WT and OC-OPN<sup>-/-</sup> bone specimens: signal intensity and peak width of individual amino acids  $^{13}\text{C}$  signals.

| Peak Number (Figure 4) |                       |            |           | 1                  | 2                             | 3                             | 4                             | 5         | 6         | 7         | 8                                                              | 9         |
|------------------------|-----------------------|------------|-----------|--------------------|-------------------------------|-------------------------------|-------------------------------|-----------|-----------|-----------|----------------------------------------------------------------|-----------|
| Partial Assignment     |                       | C=O        | GAG/Cit   | Gly C-2<br>Arg C-5 | Pro C-2<br>Hyp C-2<br>Phe C-2 | Pro C-3<br>Arg C-3<br>Lys C-3 | Pro C-4<br>Glu C-3<br>Leu C-4 | Pro C-5   | Ala C-2   | Ala C-3   | Hyp C-3<br>Lys C-6<br>Asp C-3<br>Leu C-3<br>Ile C-3<br>Phe C-3 | Hyp C-4   |
| Signal Intensity (%)   | WT                    | 14.3 ± 0.4 | 1.0 ± 0.1 | 9.7 ± 0.1          | 8.7 ± 0.2                     | 5.6 ± 0.9                     | 5.5 ± 0.3                     | 3.1 ± 0.1 | 3.9 ± 0.3 | 3.5 ± 1.0 | 5.8 ± 0.2                                                      | 3.0 ± 0.1 |
|                        | OC-OPN <sup>-/-</sup> | 13.5 ± 0.3 | 0.9 ± 0.1 | 9.5 ± 0.1          | 8.7 ± 0.2                     | 5.6 ± 0.6                     | 5.6 ± 0.3                     | 2.9 ± 0.2 | 3.9 ± 0.4 | 3.1 ± 1.2 | 5.9 ± 0.2                                                      | 3.1 ± 0.1 |
| Peak Width (ppm)       | WT                    | 5.0 ± 0.1  | 5.7 ± 0.5 | 3.0 ± 0.1          | 3.7 ± 0.1                     | 3.8 ± 0.5                     | 2.8 ± 0.1                     | 2.2 ± 0.1 | 3.1 ± 0.3 | 3.4 ± 1.0 | 5.0 ± 0.3                                                      | 2.3 ± 0.1 |
|                        | OC-OPN <sup>-/-</sup> | 4.6 ± 0.1  | 4.8 ± 0.2 | 2.9 ± 0.1          | 3.6 ± 0.1                     | 3.8 ± 0.3                     | 2.8 ± 0.1                     | 2.1 ± 0.1 | 3.1 ± 0.3 | 3.1 ± 1.1 | 5.0 ± 0.3                                                      | 2.2 ± 0.1 |
